# Supplementary material for: 右室流出路(RVOT)起源心室期外収縮(PVC)の通電前非出現例のアブレーションに関して―ペースマップとEnSiteの併用―
Source: PLOS journal article supplement (doi:10.1371/journal.pone.0150000), 2010-01-01
Supplement: S2 (10.1371/journal.pone.0150000.s002) [file journal.pone.0150000.s002]

Figure S2

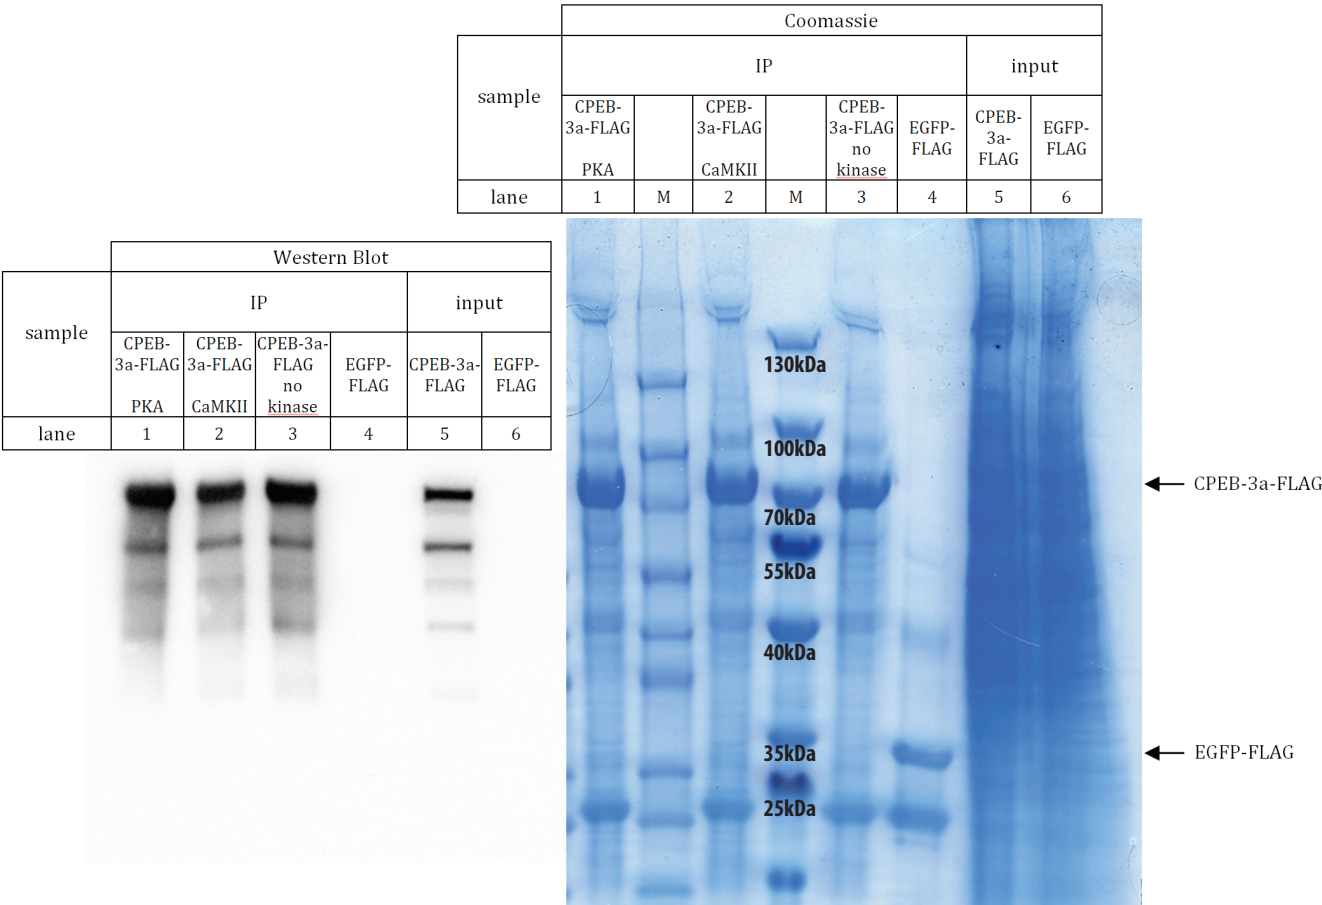

**Figure S2: Immunoprecipitation of FLAG-CPEB3a protein expressed in HEK-293 cells.** Right – Coomassie staining, left – corresponding immunoblot. FLAG-EGFP fusion protein was used as a control.
